# Supplementary material for: Characterization of Beeswax and Rice Bran Wax Oleogels Based on Different Types of Vegetable Oils and Their Impact on Wheat Flour Dough Technological Behavior during Bun Making
Source: MDPI journal article supplement (doi:10.3390/gels10030194), 2024-03-12
Supplement: s1 [file s1]

# Supplementary Materials

**Table S1A.** DSC parameters of oleogel samples, oils and waxes – second heating profile.

| Sample | Second heating, -60 to 100 °C , melting |              |         |               | Second heating, -60 to 100 °C , melting 2 |              |         |               |
|--------|-----------------------------------------|--------------|---------|---------------|-------------------------------------------|--------------|---------|---------------|
|        | Onset, °C                               | Midpoint, °C | End, °C | Enthalpy, J/g | Onset, °C                                 | Midpoint, °C | End, °C | Enthalpy, J/g |
| GO_5BW | -32.83                                  | -28.81       | -13.93  | 25.88         | 40.36                                     | 49.37        | 58.53   | 1.72          |
| GO_9BW | -32.75                                  | -29.02       | -14.92  | 26.87         | 42.85                                     | 51.90        | 61.43   | 2.96          |
| HO_5BW | -37.49                                  | -32.40       | -27.61  | 7.08          | 40.97                                     | 48.99        | 58.05   | 1.22          |
| HO_9BW | -37.94                                  | -32.69       | -27.92  | 7.74          | 40.73                                     | 51.56        | 61.49   | 2.99          |
| OL_5BW | -16.69                                  | -5.21        | 6.31    | 52.45         | 41.10                                     | 48.41        | 57.19   | 1.86          |
| OL_9BW | -17.01                                  | -5.71        | 4.10    | 62.05         | 41.32                                     | 51.52        | 59.55   | 3.30          |
| SO_5BW | -31.94                                  | -26.95       | -12.05  | 34.91         | 38.71                                     | 49.55        | 58.88   | 2.49          |
| SO_9BW | -32.21                                  | -27.35       | -11.40  | 36.11         | 42.03                                     | 51.71        | 60.48   | 3.84          |
| WO_5BW | -49.28                                  | -34.22       | -24.05  | 32.06         | 39.29                                     | 49.34        | 56.86   | 1.75          |
| WO_9BW | -47.28                                  | -34.33       | -23.95  | 32.92         | 41.45                                     | 51.93        | 62.36   | 3.31          |
| GO_5RW | -32.21                                  | -28.62       | -16.10  | 21.97         | 56.13                                     | 65.86        | 75.16   | 5.13          |
| GO_9RW | -32.42                                  | -28.64       | -14.93  | 22.91         | 55.21                                     | 67.79        | 73.64   | 8.84          |
| HO_5RW | -37.71                                  | -32.88       | -28.16  | 10.22         | 55.31                                     | 67.32        | 75.28   | 5.65          |
| HO_9RW | -38.37                                  | -32.90       | -27.92  | 11.72         | 53.77                                     | 69.93        | 76.23   | 13.47         |
| OL_5RW | -16.49                                  | -5.43        | 7.01    | 57.15         | 50.46                                     | 66.78        | 73.84   | 6.10          |
| OL_9RW | -16.24                                  | -5.26        | 5.50    | 65.45         | 48.96                                     | 66.47        | 73.63   | 10.58         |
| SO_5RW | -31.32                                  | -22.89       | -7.47   | 35.32         | 51.88                                     | 66.06        | 72.06   | 5.43          |
| SO_9RW | -31.04                                  | -22.97       | -7.65   | 40.77         | 52.02                                     | 67.32        | 72.58   | 11.63         |
| WO_5RW | -51.86                                  | -33.55       | -23.96  | 35.28         | 53.90                                     | 62.96        | 68.85   | 3.20          |
| WO_9RW | -52.42                                  | -34.04       | -25.05  | 36.58         | 52.96                                     | 68.97        | 74.70   | 14.05         |
| GO     | -32.16                                  | -28.21       | -12.58  | 29.82         | -                                         | -            | -       | -             |
| HO     | -37.27                                  | -32.43       | -20.76  | 17.87         | -                                         | -            | -       | -             |
| OL     | -27.03                                  | -5.85        | 5.62    | 74.86         | -                                         | -            | -       | -             |
| SO     | -42.48                                  | -25.96       | -7.23   | 57.99         | -                                         | -            | -       | -             |
| WO     | -50.78                                  | -34.14       | -18.00  | 44.67         | -                                         | -            | -       | -             |
| BW     | -                                       | -            | -       | -             | 33.72                                     | 62.43        | 68.61   | 165.33        |
| RW     | -                                       | -            | -       | -             | 66.72                                     | 78.74        | 85.04   | 117.54        |

**Table S1B.** DSC parameters of oleogel samples, oils and waxes – second cooling profile.

| Sample | Second cooling, 100 to 20 °C, phase transition |              |         |                          |           | Second cooling, 100 to 20 °C, crystallization |              |         |               |
|--------|------------------------------------------------|--------------|---------|--------------------------|-----------|-----------------------------------------------|--------------|---------|---------------|
|        | Onset, °C                                      | Midpoint, °C | End, °C | $\Delta C_p$ , J/(g. °C) | Onset, °C | Onset, °C                                     | Midpoint, °C | End, °C | Enthalpy, J/g |
| GO_5BW | 47.50                                          | 44.71        | 41.60   | 0.0040                   | 0.56      | -                                             | -            | -       | -             |
| GO_9BW | 45.23                                          | 48.27        | 52.50   | 0.0060                   | 1.18      | -                                             | -            | -       | -             |
| HO_5BW | 48.49                                          | 44.72        | 41.37   | 0.0090                   | 0.50      | -                                             | -            | -       | -             |
| HO_9BW | 54.36                                          | 48.19        | 45.37   | 0.0140                   | 1.89      | -                                             | -            | -       | -             |
| OL_5BW | 47.43                                          | 44.43        | 42.39   | 0.0050                   | 0.48      | -                                             | -            | -       | -             |
| OL_9BW | 51.17                                          | 47.48        | 44.94   | 0.0060                   | 1.15      | -                                             | -            | -       | -             |
| SO_5BW | 51.02                                          | 45.59        | 41.81   | 0.0030                   | 0.88      | -                                             | -            | -       | -             |
| SO_9BW | 53.82                                          | 48.79        | 46.00   | 0.0090                   | 1.49      | -                                             | -            | -       | -             |
| WO_5BW | 48.71                                          | 44.51        | 41.66   | 0.0070                   | 0.78      | -                                             | -            | -       | -             |
| WO_9BW | 54.05                                          | 48.69        | 45.46   | 0.0130                   | 1.53      | -                                             | -            | -       | -             |
| GO_5RW | 67.59                                          | 61.84        | 57.80   | 0.0040                   | 1.79      | -                                             | -            | -       | -             |
| GO_9RW | 72.30                                          | 63.70        | 61.90   | 0.0200                   | 7.75      | -                                             | -            | -       | -             |
| HO_5RW | 70.34                                          | 64.37        | 61.34   | 0.0080                   | 3.14      | -                                             | -            | -       | -             |
| HO_9RW | 75.82                                          | 67.65        | 65.41   | 0.0160                   | 6.91      | -                                             | -            | -       | -             |
| OL_5RW | 66.21                                          | 62.26        | 60.17   | 0.0010                   | 1.29      | -                                             | -            | -       | -             |
| OL_9RW | 73.14                                          | 61.62        | 60.13   | 0.0460                   | 11.44     | -                                             | -            | -       | -             |
| SO_5RW | 69.17                                          | 61.93        | 59.02   | 0.0100                   | 2.34      | -                                             | -            | -       | -             |
| SO_9RW | 72.20                                          | 64.56        | 61.55   | 0.0110                   | 6.15      | -                                             | -            | -       | -             |
| WO_5RW | 58.98                                          | 53.45        | 51.51   | 0.0080                   | 0.97      | -                                             | -            | -       | -             |
| WO_9RW | 76.19                                          | 65.86        | 64.11   | 0.0250                   | 12.79     | -                                             | -            | -       | -             |
| GO     | -                                              | -            | -       | -                        | -         | -                                             | -            | -       | -             |
| HO     | -                                              | -            | -       | -                        | -         | -                                             | -            | -       | -             |
| OL     | -                                              | -            | -       | -                        | -         | -                                             | -            | -       | -             |
| SO     | -                                              | -            | -       | -                        | -         | -                                             | -            | -       | -             |
| WO     | -                                              | -            | -       | -                        | -         | -                                             | -            | -       | -             |
| BW     | -                                              | -            | -       | -                        | -         | -                                             | -            | -       | -             |
| RW     | 84.51                                          | 75.61        | 73.98   | 0.0120                   | 66.25     | 60.32                                         | 56.48        | 45.55   | 21.04         |

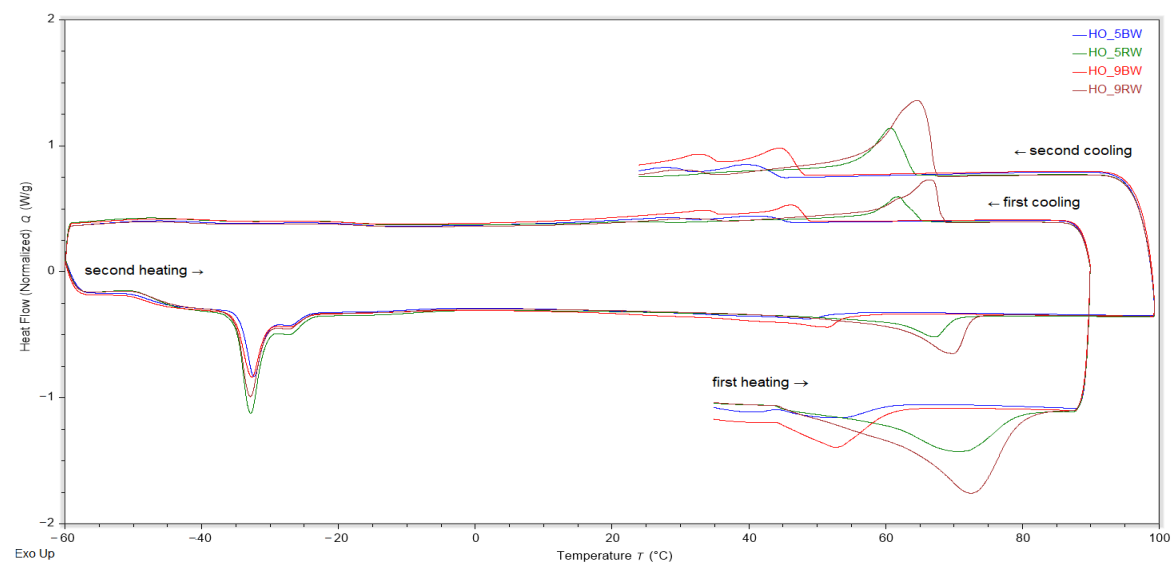

A

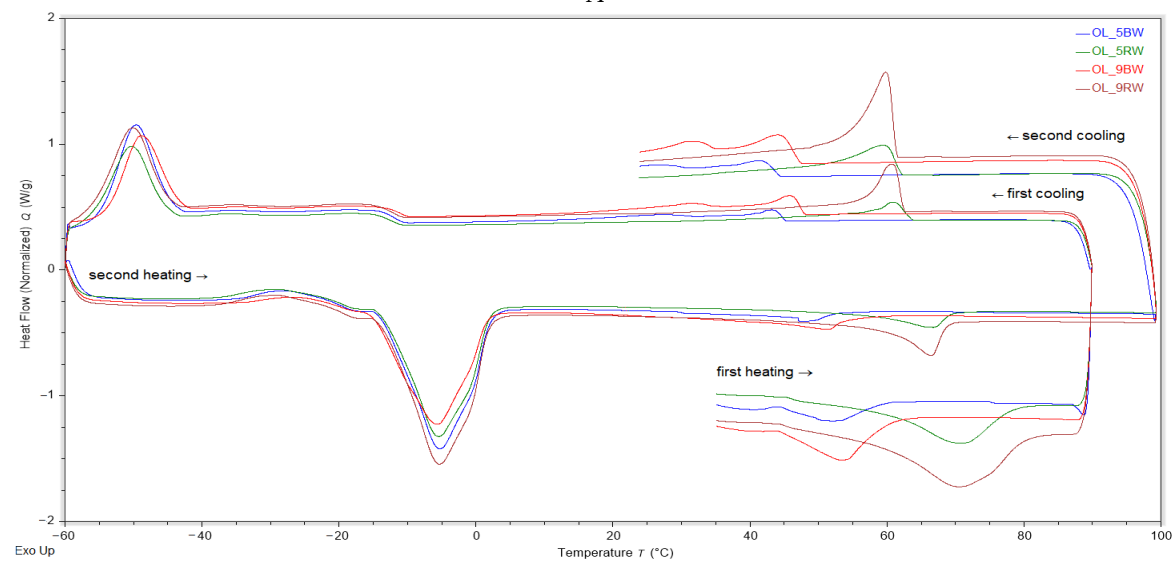

B

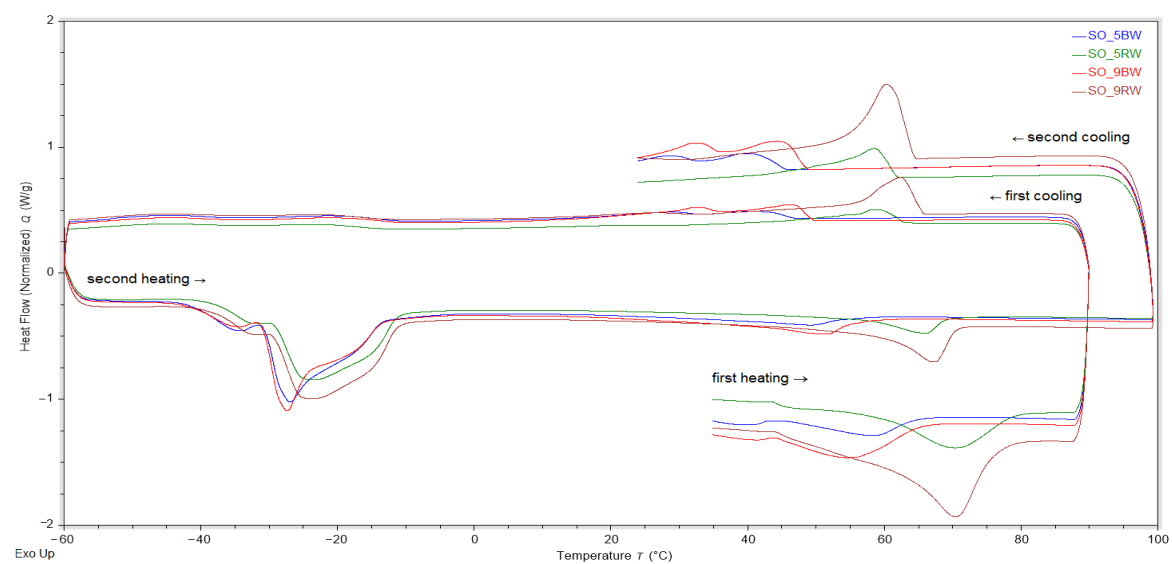

C

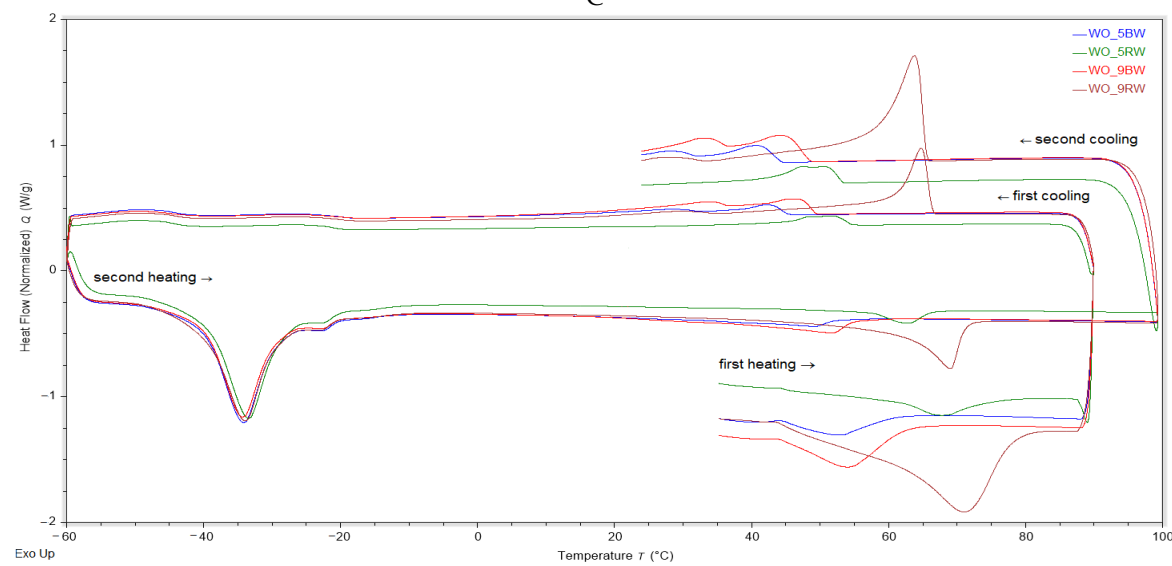

D

**Figure S1.** Thermograms of oleogels, oils, and waxes for heating ( $\rightarrow$ ) and cooling ( $\leftarrow$ ) profiles.

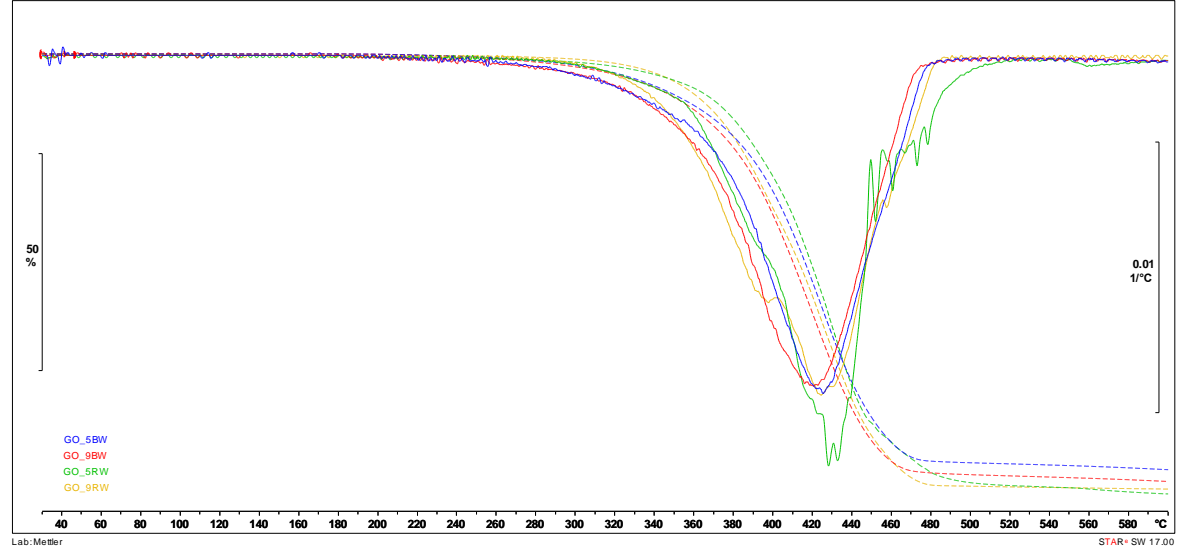

A

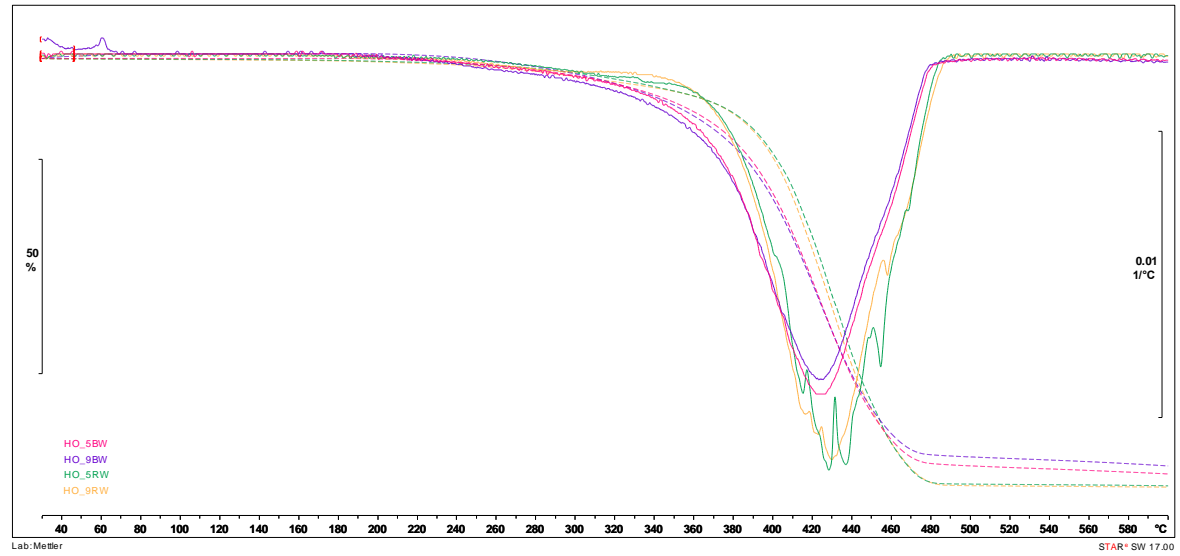

B

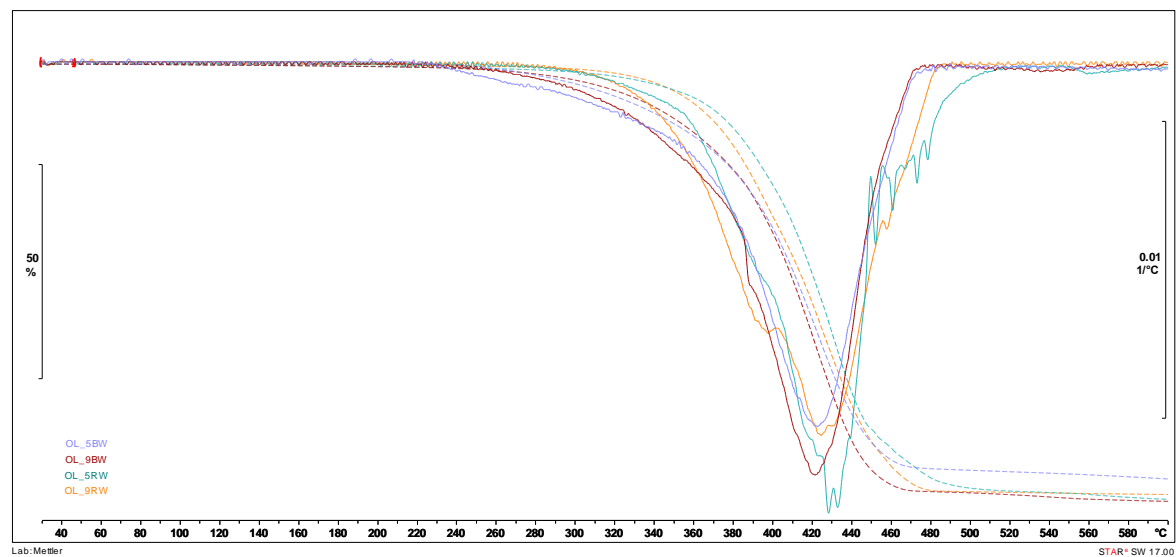

C

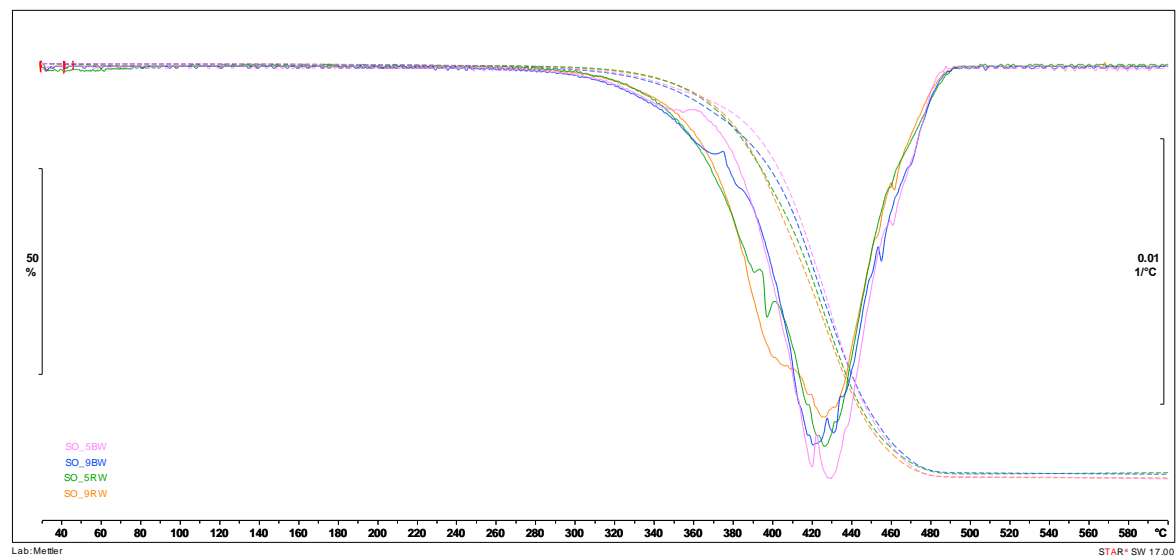

D

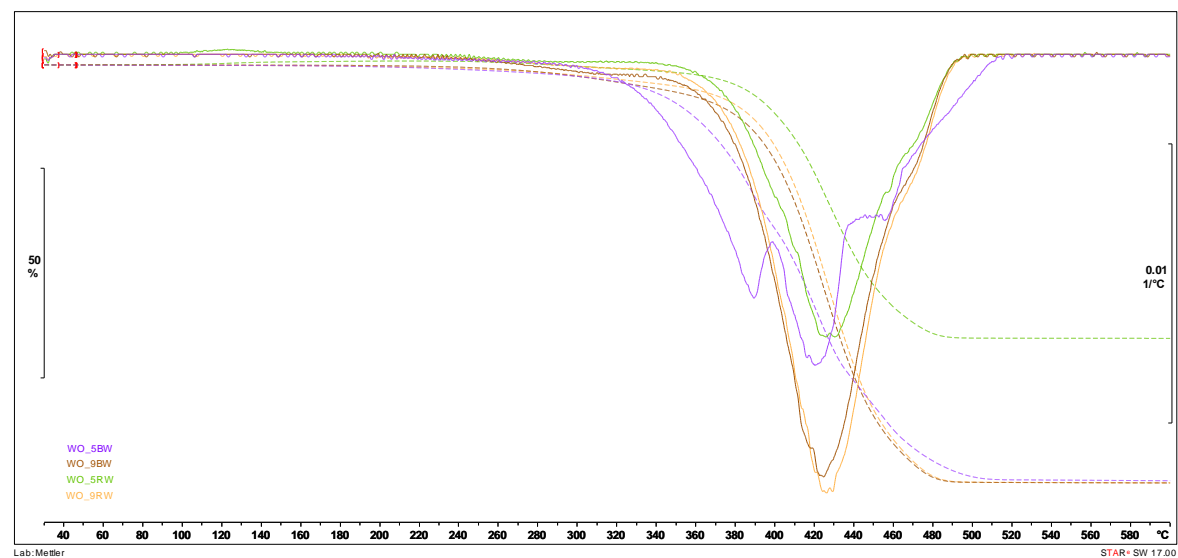

**Figure S2.** TGA (dashed line)/DTG (solid line) thermograms for oleogels formulated with different types of oil and wax
